# Supplementary material for: Ultrabright fluorescent silica particles with a large number of complex spectra excited with a single wavelength for multiplex applications
Source: Royal Society of Chemistry journal article supplement (doi:10.1039/c6nr08976c), 2017-01-01
Supplement: c6nr08976c1.pdf [file c6nr08976c1.pdf]

**Supplementary Information**  
**for**  
**Ultrabright fluorescent silica particles with a large number of**  
**complex spectra excited with single wavelength for multiplex**  
**applications**

*S. Palantavida<sup>1</sup>, B. Peng<sup>2</sup>, I. Sokolov<sup>1,2,3\*</sup>*

<sup>1</sup> Department of Mechanical Engineering, Tufts University, 200 College Ave., Medford, MA 02155, USA;

<sup>2</sup> Department of Biomedical Engineering, Tufts University, 4 Colby St., Medford, MA 02155, USA.

<sup>3</sup>Department of Physics, Tufts University, 574 Boston Ave., Medford, MA 02155, USA.

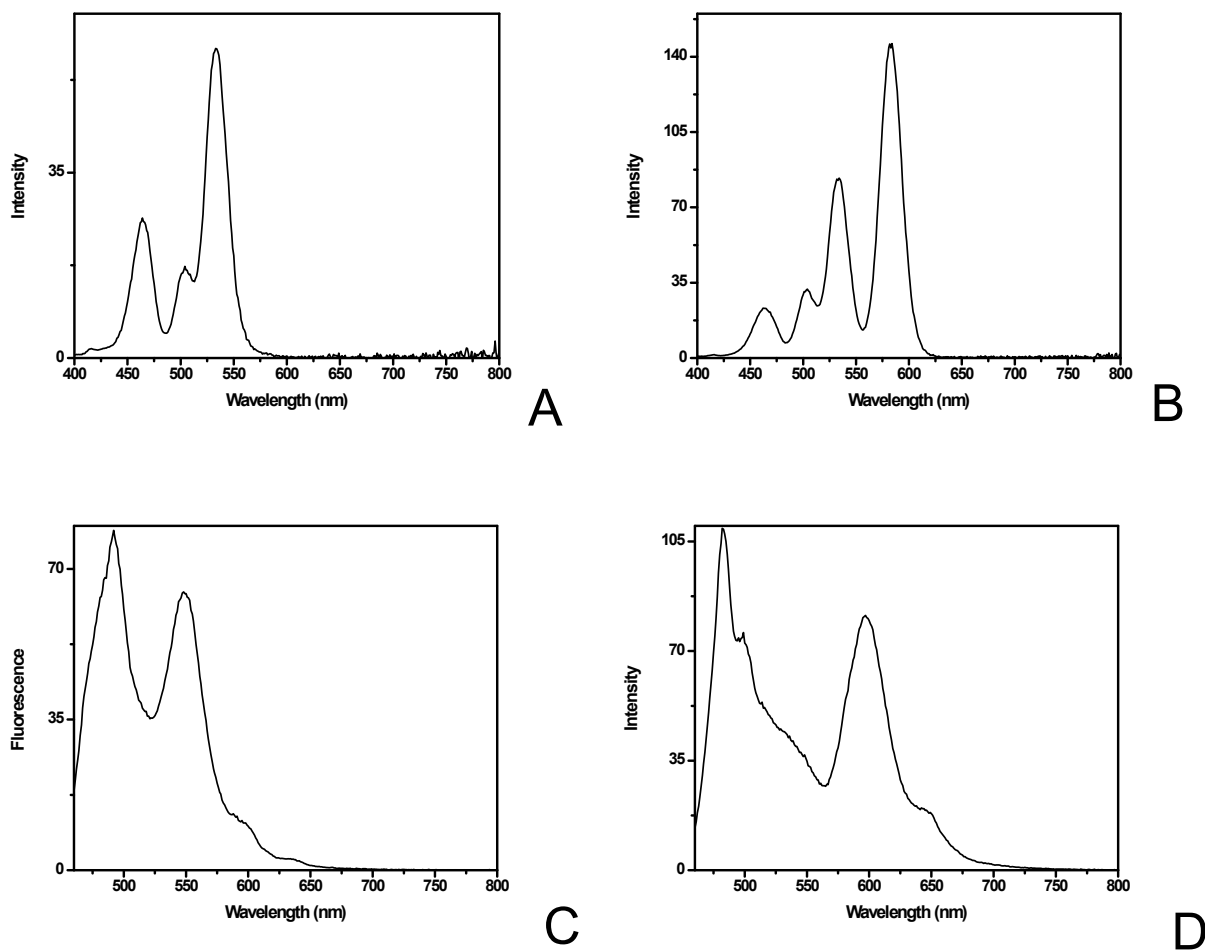

Figure S1: Synchronous spectra obtained with an offset of 10 nm for A. 3 dye (Coumarin 504, Rhodamine 540 and rhodamine 6G) and B. 4 dye (Coumarin 504, Rhodamine 540 and rhodamine 6G and rhodamine 640) encapsulated discoids. The fluorescence spectra of C. three dye and D. four dye encapsulated discoid obtained by excitation at 450 nm.

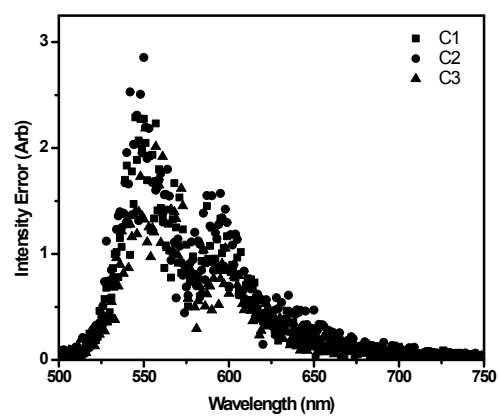

*Figure S2: Standard deviation of intensity obtained from quadruple measurements for C1, C2, C3 components.*
